# Supplementary material for: Genomic Adaptations and Evolutionary Trends in the Emerging Norovirus GII.17
Source: Research Square preprint supplement (doi:10.21203/rs.3.rs-6607382/v1), 2025-05-21
Supplement: Supplementary file 2 [file fc91a48b7eb574b1b362a738.xlsx]

## Sheet: Sheet1
Genotype	p48	NTPase	p22	VPg	3CLpro	rdrp	VP1	VP2	p-value
GII.6	72	72	72	72	72	72	72	71	0.4289
GII.2	200	202	202	202	202	202	202	199	0.4289
GII.4	582	584	584	584	584	584	584	581	0.4289
GII.3	139	141	141	142	142	142	142	137	0.4289
GII.17	179	177	181	177	180	175	181	176	0.4289
